# Supplementary material
Source: PubMed Central journal article supplement (PMC4197011)
Supplement: NIHMS630367-supplement-01.pdf [file NIHMS630367-supplement-01.pdf]

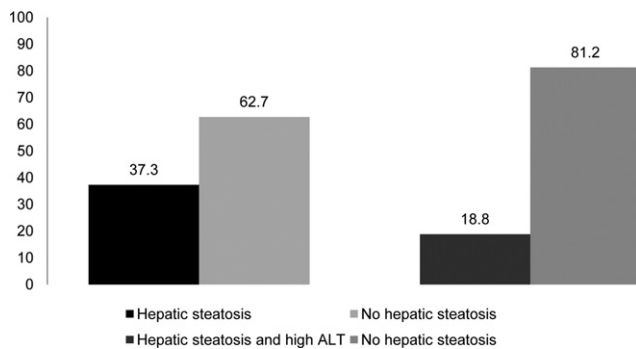

**Supplementary Figure 1.** Weighted liver phenotypes prevalence in the analytical sample of NHANES III (1991–1994).

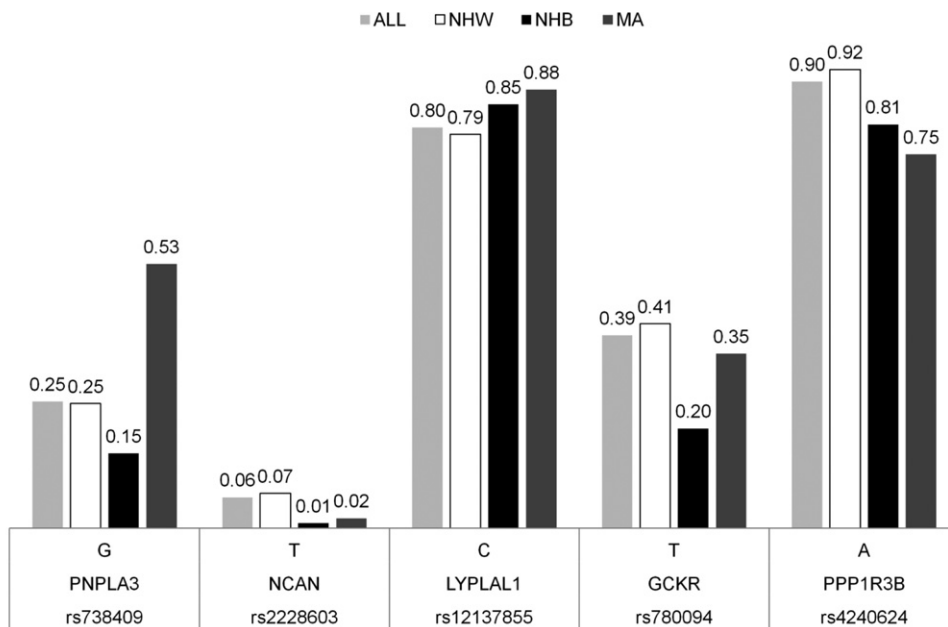

*PNPLA3*: patatin-like phospholipase domain-containing protein 3 (HUGO Gene Nomenclature Committee, HGNC: 18590); *NCAN*: neurocan (HGNC: 2465); *LYPLAL1*: lysophospholipase-like 1 (HGNC: 20440); *GCKR*: glucokinase regulatory protein (HGNC: 4196); *PPP1R3B*: protein phosphatase 1, regulatory subunit 3b (HGNC: 14942). NHW: non-Hispanic White; NHB: non-Hispanic Black and MA: Mexican-American; ALL= NHW+NHB+MA

**Supplementary Figure 2.** Weighted allele prevalence in the analytical sample of NHANES III (1991–1994), by race/ethnicity.

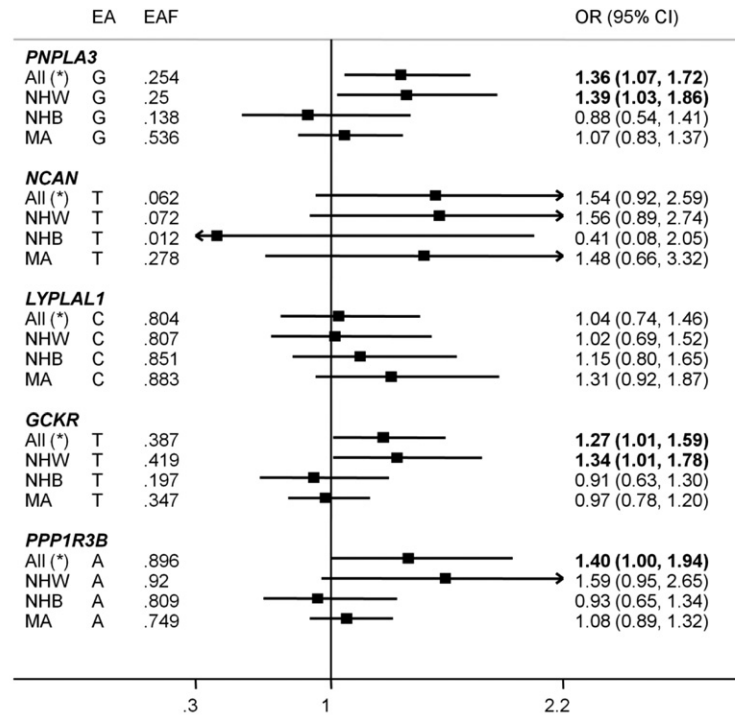

EA: Effect allele; EAF: effect allele frequency; OR: Odds ratio; CI: confidence interval; *PNPLA3*: patatin-like phospholipase domain-containing protein 3 (HUGO Gene Nomenclature Committee, HGNC: 18590); *NCAN*: neurocan (HGNC: 2465); *LYPLAL1*: lysophospholipase-like 1 (HGNC: 20440); *GCKR*: glucokinase regulatory protein (HGNC: 4196); *PPP1R3B*: protein phosphatase 1, regulatory subunit 3b (HGNC: 14942). NHW: non-Hispanic White; NHB: non-Hispanic Black and MA: Mexican-American; (\*) ALL= NHW+NHB+MA

**Supplementary Figure 3.** Association between high ALT level (>30 U/L in men or >19 U/L in women) and different SNPs, stratified by ethnicity in the NHANES III (1991–1994), population-weighted, additive model, adjusted for age, age squared, sex, and alcohol consumption.

**Supplementary Table 1.** Multivariate Analyses for Each Genetics of Obesity-related Liver Disease Consortium SNP in 4804 NHANES III Participants for Effects on AST/ALT Ratio, Weighted

| SNP ID     | Nearest        | EA | All <sup>a</sup> |         | NHW          |         | NHB          |         | MA           |         |
|------------|----------------|----|------------------|---------|--------------|---------|--------------|---------|--------------|---------|
|            |                |    | Effect (SE)      | P value | Effect (SE)  | P value | Effect (SE)  | P value | Effect (SE)  | P value |
| rs738409   | <i>PNPLA3</i>  | G  | -0.02 (0.05)     | .69     | 0.01 (0.07)  | .89     | -0.03 (0.06) | .59     | 0.06 (0.04)  | .14     |
| rs2228603  | <i>NCAN</i>    | T  | -0.08 (0.04)     | .06     | -0.09 (0.07) | .17     | 0.53 (0.14)  | <.01    | -0.14 (0.11) | .20     |
| rs12137855 | <i>LYPLAL1</i> | C  | 0.04 (0.04)      | .32     | 0.04 (0.04)  | .31     | -0.05 (0.03) | .09     | 0.13 (0.06)  | .04     |
| rs780094   | <i>GCKR</i>    | T  | 0.01 (0.03)      | .87     | 0.02 (0.04)  | .60     | -0.01 (0.03) | .86     | 0.06 (0.05)  | .21     |
| rs4240624  | <i>PPP1R3B</i> | A  | -0.09 (0.03)     | .01     | -0.12 (0.05) | .03     | -0.01 (0.05) | .81     | -0.07 (0.04) | .13     |

EA, effect allele; effect, increase in inverse normalized ALT/AST; SE, standard error; *PNPLA3*: HUGO Gene Nomenclature Committee (HGNC), 18590; *NCAN*: HGNC, 2465; *LYPLAL1*: HGNC, 20440; *GCKR*: HGNC, 4196; *PPP1R3B*: HGNC, 14942.

<sup>a</sup>All = NHW + NHB + MA.
